# Supplementary material
Source: bioRxiv or medRxiv preprint supplement (https://www.biorxiv.org/highwire/filestream/73188/field_highwire_adjunct_files/6/091512-5.pdf)

**Figure S5**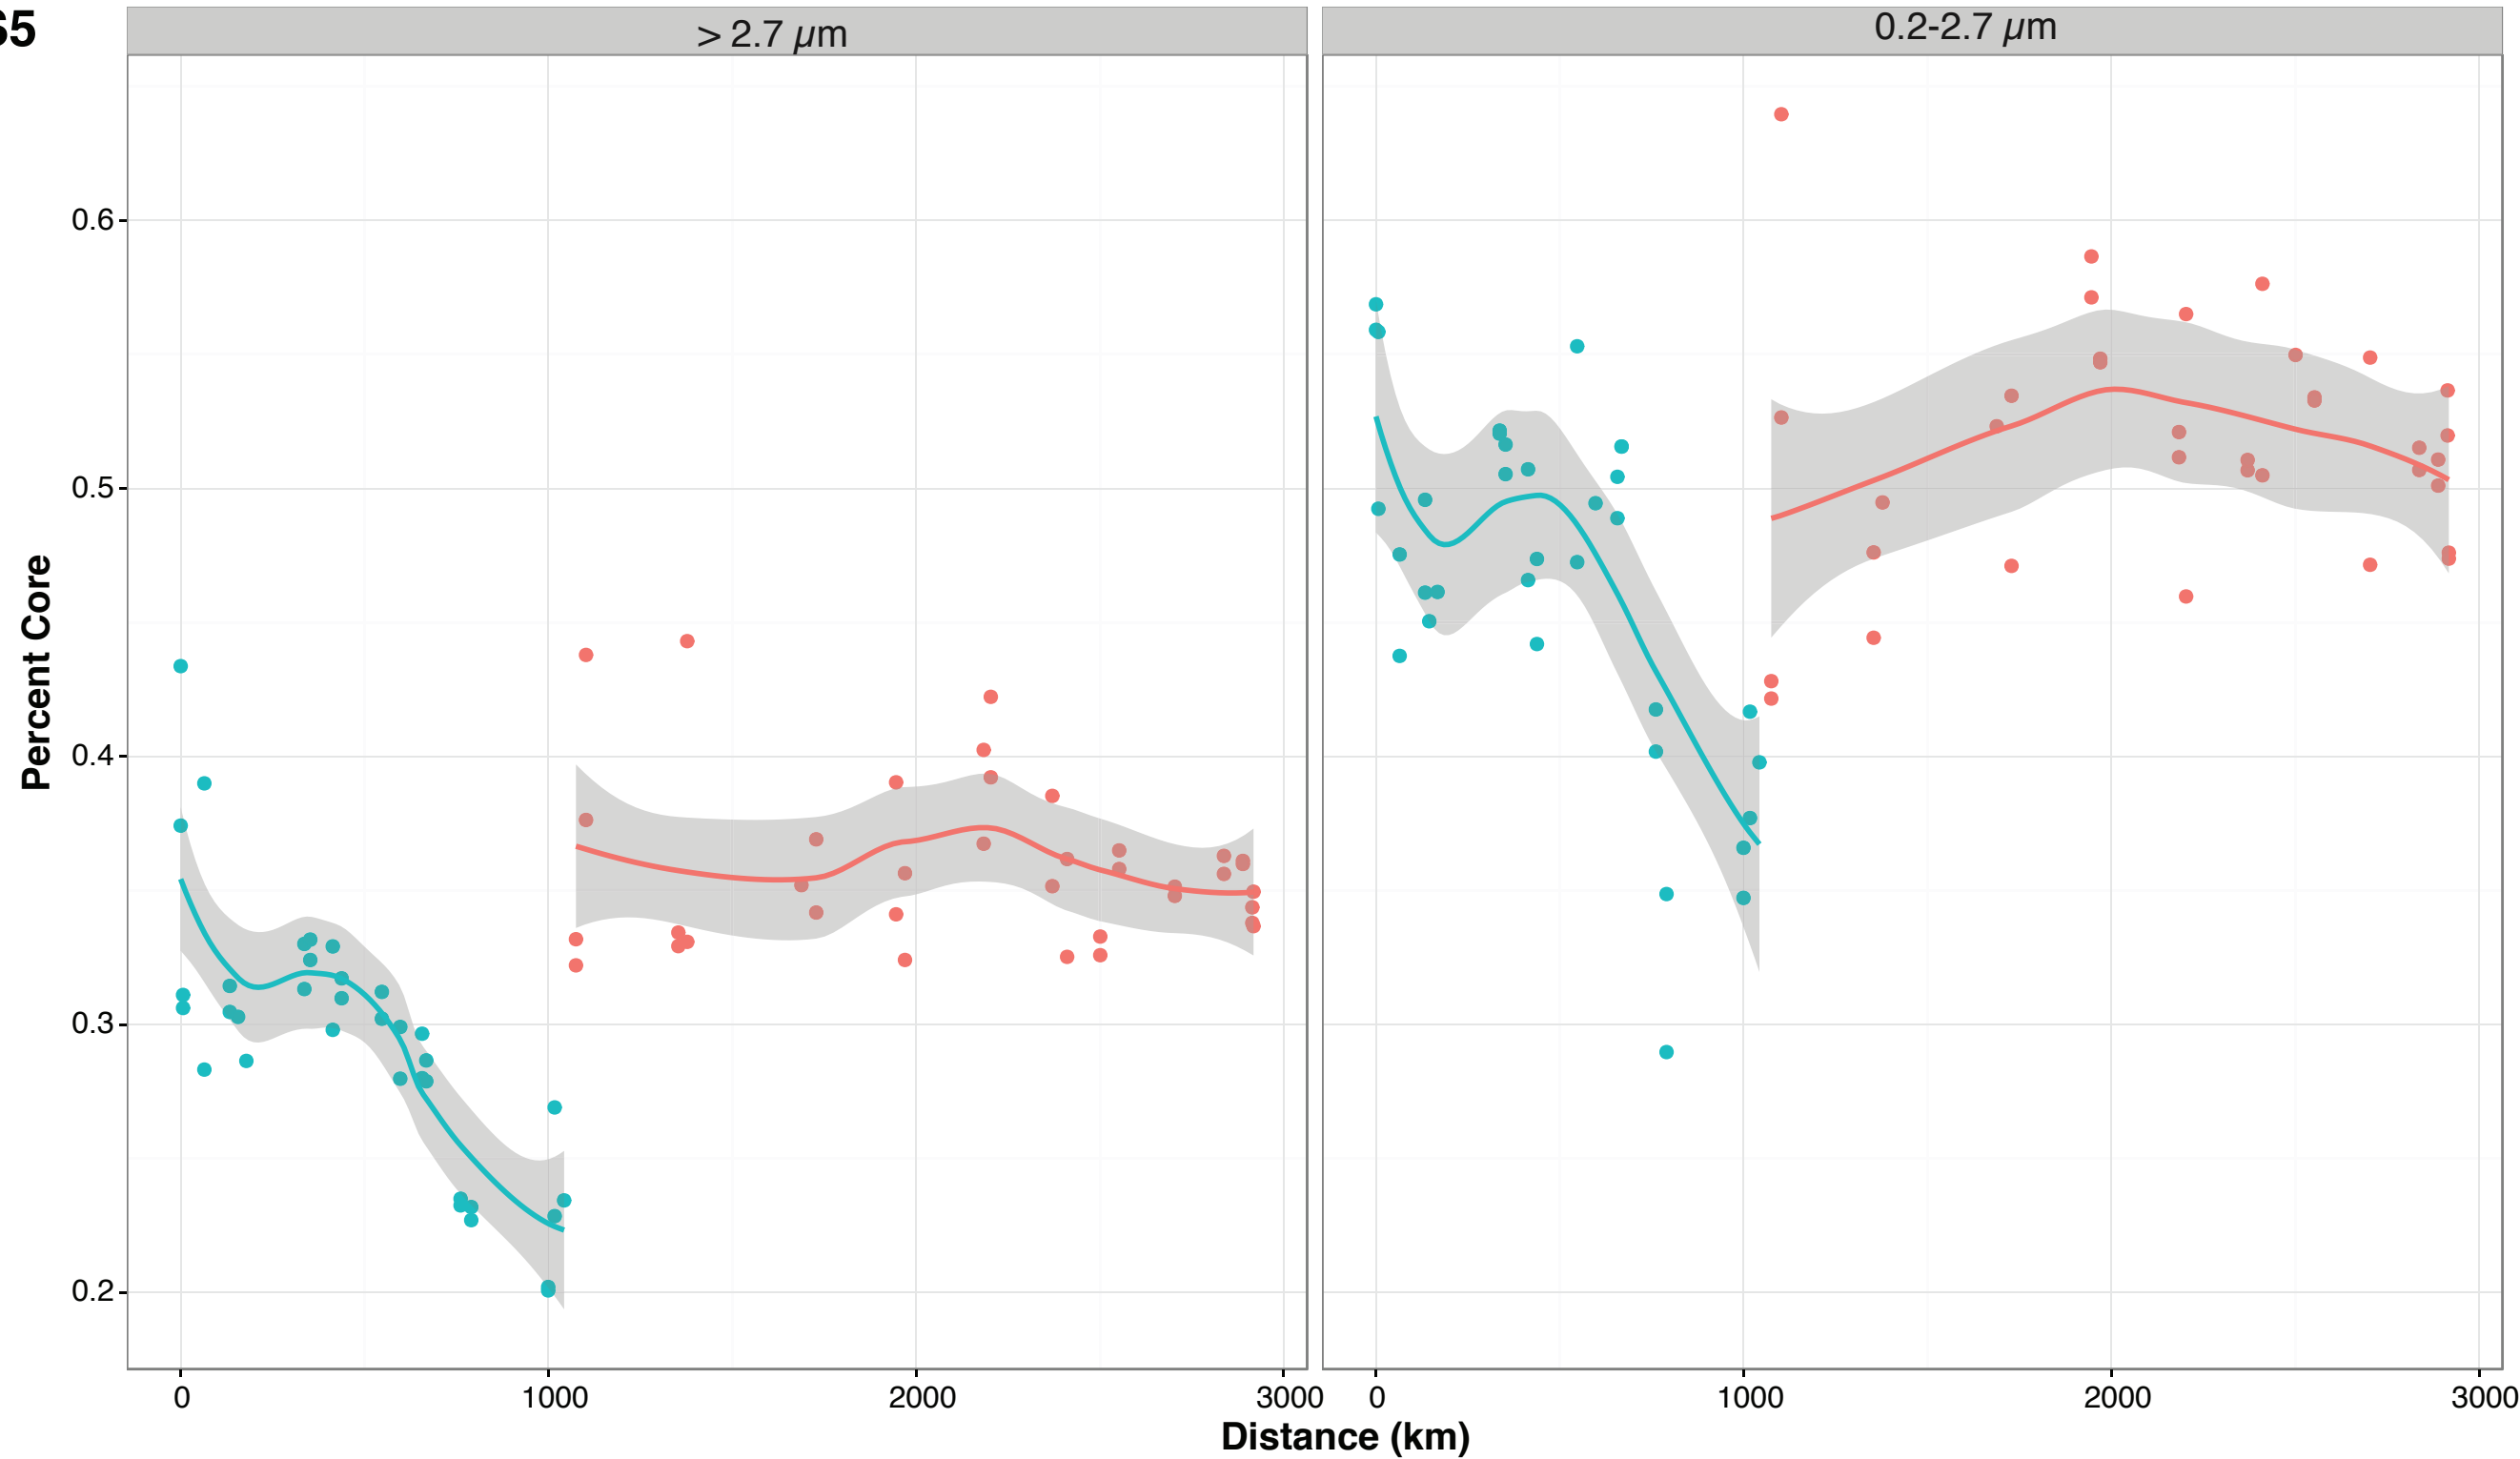

Supplement: Supplementary file [file 091512-5.pdf]
